# Supplementary material for: Representation and Reasoning of Three-Dimensional Spatial Relationships Based on R5DOS-Intersection Model Representation and Reasoning Based on R5DOS Model
Source: Hindawi journal article supplement (doi:10.1155/2020/3849053), 2020-10-06
Supplement: f1 [file 3849053.f1.docx]

**Matrix screening algorithm**

This code is the screening algorithm of the R5DOS intersection model. The purpose is to screen several matrices theoretically in the model according to the constraints and finally get the algorithm of the matrix that meets the requirements, the result of running the code needs simple processing, not the result of the article. The code is developed based on MATLAB software, as follows.

clc;

clear;

load DO;

c=find(DO(1:end,8)~=1);

DO(c,:)=[];

a1=DO(1:end,1:4);

a2=DO(1:end,5:8);

a3=DO(1:end,[1 3 5 7]);

a4=DO(1:end,[2 4 6 8]);

a5=DO(1:end,[1 2 5 6]);

a6=DO(1:end,[3 4 7 8]);

a7=a1+a2;

a8=a3+a4;

a9=a5+a6;

a10=[a7;a8;a9];

a10(a10==2)=1;

dr=[0 1 1 1];

po=[1 1 1 1];

pp=[1 0 1 1];

eq=[1 0 0 1];

ppi=[1 1 0 1];

L1=ismember(a10,dr,'rows');

L2=ismember(a10,po,'rows');

L3=ismember(a10,pp,'rows');

L4=ismember(a10,eq,'rows');

L5=ismember(a10,ppi,'rows');

L=L1+L2+L3+L4+L5;

L=logical(L);

l1=L(1:17536);

l2=L(17537:35072);

l3=L(35073:52608);

a=find(l1==l2&l2==l3&l1==l3&l1==1);

DOs=DO(a,:);

DOs1=DOs;

b1=DOs(1:end,1:4);

b2=DOs(1:end,5:8);

b3=DOs(1:end,[1 3 5 7]);

b4=DOs(1:end,[2 4 6 8]);

b5=DOs(1:end,[1 2 5 6]);

b6=DOs(1:end,[3 4 7 8]);

b11=DOs(1:end,1:8);

b12=DOs(1:end,9:24);

b7=b1+b2;

b8=b3+b4;

b9=b5+b6;

b10=[b7;b8;b9];

b10(b10==2)=1;

L11=ismember(b10,dr,'rows');

L12=ismember(b10,po,'rows');

L13=ismember(b10,pp,'rows');

L14=ismember(b10,eq,'rows');

L15=ismember(b10,ppi,'rows');

n=44799/3;

M1=[L11(1:14933,:),L11(14934:29866,:),L11(29867:44799,:)];

M2=[L12(1:14933,:),L12(14934:29866,:),L12(29867:44799,:)];

M3=[L13(1:14933,:),L13(14934:29866,:),L13(29867:44799,:)];

M4=[L14(1:14933,:),L14(14934:29866,:),L14(29867:44799,:)];

M5=[L15(1:14933,:),L15(14934:29866,:),L15(29867:44799,:)];

x9=sum(M1,2);

x1=sum(M3,2);

x2=sum(M2,2);

x10=sum(M4,2);

x3=sum(M5,2);

x4=sum(b11,2);

x7=sum(b12,2);

x12=sum(M5(:,2:3),2);

x5=find(x1==2&x2==1&x4==4|x12~=2&x3==2&x2==1&x4==4|x3==1&x2==1&x4==4|x1==1&x2==1&x4==4);

pp1po1=DOs(x5,:);

x6=find(x1==1&x2==2&x4==5|x3==1&x2==2&x4==5);

pp1po2=DOs(x6,:);

x8=find(x2==2&x9==1&x4==5);

po2dr1=DOs(x8,:);

x13=find(x10==1);

po1=DOs(x13,:);

x11=sort([x5;x6;x8;x13]);

quyu2=DOs(x11,:);

Quyu2=quyu2(sum(quyu2(1:end,9:24),2)==1,:);

c1=find(x10==3);

c2=find(x12==2&x2==1&x4==4);

c3=find(x10==0&x3==2&x4==3|x10==0&x1==2&x4==3|x3==1&x1==1&x9==1&x4==3);

c4=find(x2==3&x4~=8);

c5=sort([c1;c2;c3;c4]);

c6=find(x9==2&M3(1:end,1)==1|x9==2&M5(1:end,1)==1);

quyu1=DOs(c5,:);

Quyu1=quyu1(sum(quyu1(1:end,9:24),2)==0,:);

d=sort([x11;c5]);

DOs1(d,:)=[];

f=DOs1(1:end,9:24);

f2=DOs(:,9:24);

f3=find(sum(f2,2)==0);

f1=find(sum(f,2)==0);

DOs1(f1,:)=[];

e=DOs(c6,:);

e((sum(e,2)==4),:)=[];

d1=find(e(:,9)==1&e(:,19)==1|e(:,9)==1&e(:,22)==1|e(:,9)==1&e(:,23)==1);

d2=find(e(:,10)==1&e(:,20)==1|e(:,10)==1&e(:,21)==1|e(:,10)==1&e(:,24)==1);

d3=find(e(:,11)==1&e(:,17)==1|e(:,11)==1&e(:,21)==1|e(:,11)==1&e(:,24)==1);

d4=find(e(:,12)==1&e(:,18)==1|e(:,12)==1&e(:,22)==1|e(:,12)==1&e(:,23)==1);

d5=find(e(:,13)==1&e(:,15)==1|e(:,13)==1&e(:,19)==1|e(:,13)==1&e(:,23)==1);

d6=find(e(:,14)==1&e(:,16)==1|e(:,14)==1&e(:,20)==1|e(:,14)==1&e(:,24)==1);

d7=find(e(:,15)==1&e(:,13)==1|e(:,15)==1&e(:,17)==1|e(:,15)==1&e(:,21)==1);

d8=find(e(:,16)==1&e(:,14)==1|e(:,16)==1&e(:,18)==1|e(:,16)==1&e(:,22)==1);

d9=find(e(:,17)==1&e(:,11)==1|e(:,17)==1&e(:,15)==1|e(:,17)==1&e(:,19)==1);

d10=find(e(:,18)==1&e(:,16)==1|e(:,18)==1&e(:,20)==1|e(:,18)==1&e(:,12)==1);

d11=find(e(:,19)==1&e(:,13)==1|e(:,19)==1&e(:,17)==1|e(:,19)==1&e(:,9)==1);

d12=find(e(:,20)==1&e(:,14)==1|e(:,20)==1&e(:,18)==1|e(:,20)==1&e(:,10)==1);

d13=find(e(:,21)==1&e(:,10)==1|e(:,21)==1&e(:,11)==1|e(:,21)==1&e(:,15)==1);

d14=find(e(:,22)==1&e(:,9)==1|e(:,22)==1&e(:,12)==1|e(:,22)==1&e(:,16)==1);

d15=find(e(:,23)==1&e(:,9)==1|e(:,23)==1&e(:,12)==1|e(:,23)==1&e(:,13)==1);

d16=find(e(:,24)==1&e(:,10)==1|e(:,24)==1&e(:,11)==1|e(:,24)==1&e(:,14)==1);

d111=sort([d1;d2;d3;d4;d5;d6;d7;d8;d9;d10;d11;d12;d13;d14;d15;d16]);

e(d111,:)=[];

z=unique(sort([c6;d;f3]));

DOs(z,:)=[];

DOS=[DOs;e;Quyu1;Quyu2];

f4=DOS(:,9:24);

f5=sum(f4,2);

f6=find(f5==2);
